# Supplementary material for: A Single Variant in Pri-miRNA-155 Associated with Susceptibility to Hereditary Breast Cancer Promotes Aggressiveness in Breast Cancer Cells
Source: MDPI journal article supplement (doi:10.3390/ijms232315418), 2022-12-06
Supplement: s1 [file s1]

**Supplementary Table S1. Clinical data of patients**

| Case | Breast cancer cases in the family | Bilateral breast cancer in the family | Ovarian cancer in the family | Age of diagnosis of the proband | Histological type   |
|------|-----------------------------------|---------------------------------------|------------------------------|---------------------------------|---------------------|
| F1   | 4                                 |                                       |                              | 42                              | Ductal              |
| F2   | 3                                 |                                       |                              | 49                              | Ductal              |
| F3   | 3                                 |                                       |                              | 50                              | Ductal              |
| F4   | 2                                 |                                       |                              | 23                              | Ductal In Situ      |
| F5   | 3                                 |                                       |                              | 57                              | Ductal In Situ      |
| F6   | 2                                 |                                       |                              | 20                              | Ductal In Situ      |
| F7   | 2                                 | 1                                     | 1                            | 48                              | Ductal In Situ      |
| F8   | 4                                 |                                       |                              | 69                              | Ductal In Situ      |
| F9   | 4                                 |                                       |                              | 47                              | Ductal In Situ      |
| F10  | 3                                 |                                       |                              | 58                              | Ductal In Situ      |
| F11  | 3                                 | 1                                     |                              | 59                              | Ductal In Situ      |
| F12  | 3                                 |                                       |                              | 68                              | Ductal In Situ      |
| F13  | 3                                 |                                       |                              | 38                              | Ductal Infiltrating |
| F14  | 3                                 |                                       | 1                            | 49                              | Ductal Infiltrating |
| F15  | 3                                 |                                       |                              | 38                              | Ductal Infiltrating |
| F16  | 3                                 |                                       |                              | 55                              | Ductal Infiltrating |
| F17  | 1                                 |                                       | 1                            | 30                              | Ductal Infiltrating |
| F18  | 3                                 | 1                                     | 1                            | 40                              | Ductal Infiltrating |
| F19  | 2                                 | 1                                     |                              | 36                              | Ductal Infiltrating |
| F20  | 2                                 | 1                                     |                              | 32                              | Ductal Infiltrating |
| F21  | 3                                 |                                       |                              | 65                              | Ductal Infiltrating |
| F22  | 3                                 |                                       |                              | 45                              | Ductal Infiltrating |
| F23  | 3                                 |                                       |                              | 26                              | Ductal Infiltrating |
| F24  | 1                                 |                                       |                              | 29                              | Ductal Infiltrating |
| F25  | 2                                 |                                       | 1                            | 48                              | Ductal Infiltrating |
| F26  | 2                                 | 1                                     |                              | 30                              | Ductal Infiltrating |
| F27  | 5                                 | 2                                     |                              | 45                              | Ductal Infiltrating |
| F28  | 3                                 | 2                                     |                              | 37                              | Ductal Infiltrating |
| F29  | 2                                 |                                       | 1                            | 42                              | Ductal Infiltrating |
| F30  | 3                                 |                                       |                              | 46                              | Ductal Infiltrating |
| F31  | 3                                 |                                       |                              | 59                              | Ductal Infiltrating |
| F32  | 5                                 |                                       |                              | 55                              | Ductal Infiltrating |
| F33  | 2                                 | 1                                     |                              | 42                              | Ductal Infiltrating |
| F34  | 4                                 |                                       |                              | 46                              | Ductal Infiltrating |
| F35  | 3                                 |                                       |                              | 48                              | Ductal Infiltrating |
| F36  | 13                                |                                       |                              | 65                              | Ductal Infiltrating |
| F37  | 5                                 | 1                                     |                              | 55                              | Ductal Infiltrating |
| F38  | 3                                 | 2                                     |                              | 34                              | Ductal Infiltrating |
| F39  | 4                                 |                                       |                              | 30                              | Ductal Infiltrating |

|     |   |   |   |    |                         |
|-----|---|---|---|----|-------------------------|
| F40 | 4 | 1 | 1 | 37 | Ductal Infiltrating     |
| F41 | 2 |   |   | 21 | Ductal Infiltrating     |
| F42 | 4 |   |   | 50 | Ductal Infiltrating     |
| F43 | 1 |   |   | 29 | Ductal Infiltrating     |
| F44 | 4 | 2 |   | 32 | Ductal Infiltrating     |
| F45 | 3 |   |   | 56 | Ductal Infiltrating     |
| F46 | 5 |   |   | 54 | Ductal Infiltrating     |
| F47 | 3 |   |   | 30 | Ductal Infiltrating     |
| F48 | 2 | 1 | 1 | 48 | Ductal Infiltrating     |
| F49 | 4 |   |   | 55 | Ductal Infiltrating     |
| F50 | 2 |   | 4 | 58 | Ductal Infiltrating     |
| F51 | 5 |   |   | 42 | Ductal Infiltrating     |
| F52 | 4 |   |   | 58 | Ductal Infiltrating     |
| F53 | 2 | 1 |   | 30 | Ductal Infiltrating     |
| F54 | 3 |   |   | 54 | Ductal Infiltrating     |
| F55 | 2 |   |   | 28 | Ductal Infiltrating     |
| F56 | 2 | 1 |   | 34 | Ductal Infiltrating     |
| F57 | 3 |   | 1 | 46 | Ductal Infiltrating     |
| F58 | 3 | 1 |   | 42 | Ductal Infiltrating     |
| F59 | 4 |   |   | 46 | Ductal Infiltrating     |
| F60 | 5 |   | 1 | 53 | Ductal Infiltrating     |
| F61 | 3 |   |   | 24 | Ductal Infiltrating     |
| F62 | 3 |   |   | 36 | Ductal Infiltrating     |
| F63 | 4 |   |   | 47 | Ductal Infiltrating     |
| F64 | 7 |   | 1 | 59 | Ductal Infiltrating     |
| F65 | 6 |   |   | 49 | Ductal Infiltrating     |
| F66 | 3 | 1 |   | 58 | Ductal Infiltrating     |
| F67 | 1 |   |   | 23 | Ductal Infiltrating     |
| F68 | 1 |   |   | 28 | Ductal Infiltrating     |
| F69 | 3 |   |   | 42 | Ductal Infiltrating     |
| F70 | 3 | 3 |   | 35 | Ductal Infiltrating     |
| F71 | 3 |   |   | 60 | In Situ                 |
| F72 | 4 |   |   | 27 | In Situ                 |
| F73 | 2 | 1 |   | 38 | In Situ                 |
| F74 | 3 |   |   | 70 | In Situ                 |
| F75 | 7 |   |   | 47 | In Situ                 |
| F76 | 2 |   |   | 48 | Infiltrating            |
| F77 | 3 |   |   | 46 | Lobulillar              |
| F78 | 3 | 1 |   | 56 | Lobulillar              |
| F79 | 5 | 1 |   | 53 | Lobulillar In Situ      |
| F80 | 7 | 2 |   | 45 | Lobulillar In Situ      |
| F81 | 3 |   |   | 74 | Lobulillar Infiltrating |
| F82 | 5 |   |   | 47 | Lobulillar Infiltrating |

|      |   |   |   |    |                         |
|------|---|---|---|----|-------------------------|
| F83  | 4 |   |   | 49 | Lobulillar Infiltrating |
| F84  | 5 |   |   | 44 | Lobulillar Infiltrating |
| F85  | 5 |   |   | 46 | Lobulillar Infiltrating |
| F86  | 9 |   |   | 50 | Lobulillar Infiltrating |
| F87  | 1 |   | 1 | 31 | Mixed                   |
| F88  | 3 |   |   | 32 | Mucinous Infiltrating   |
| F89  | 3 |   |   | 42 | N.I.                    |
| F90  | 5 |   |   | 47 | N.I.                    |
| F91  | 3 |   |   | 31 | N.I.                    |
| F92  | 3 |   |   | 52 | N.I.                    |
| F93  | 4 |   |   | 32 | N.I.                    |
| F94  | 4 |   |   | 70 | N.I.                    |
| F95  | 4 |   |   | 45 | N.I.                    |
| F96  | 3 |   |   | 72 | N.I.                    |
| F97  | 4 |   |   | 55 | N.I.                    |
| F98  | 3 |   | 1 | 45 | N.I.                    |
| F99  | 4 | 1 |   | 62 | N.I.                    |
| F100 | 5 |   |   | 64 | N.I.                    |

N.I.: not identified.

**Supplementary Table S2.** Allele frequencies of variants found in BC patients

| miRNAs          | SNP             | Allele frequency in BC patients (allele) |           | MAF <sup>a</sup> | <i>p</i> value <sup>b</sup> |
|-----------------|-----------------|------------------------------------------|-----------|------------------|-----------------------------|
| <b>miR-10b</b>  | rs1867863 G>T   | 0.570 (G)                                | 0.430 (T) | 0.4660           | 0.31860                     |
|                 | rs138423463 A>G | 0.980 (A)                                | 0.020 (G) | 0.0020           | 0.00100                     |
|                 | n.300 G>T       | 0.995 (G)                                | 0.005 (T) | ND               |                             |
|                 | n.310 C>T       | 0.995 (C)                                | 0.005 (T) | ND               |                             |
| <b>miR-21</b>   | rs570199250     | 0.995 (-)                                | 0.005 (T) | 0.0003           | 0.08300                     |
| <b>miR-125a</b> | rs12976445 C>T  | 0.385 (C)                                | 0.615 (T) | 0.3470           | 0.00001                     |
|                 | rs372615282 T>C | 0.995 (T)                                | 0.005 (C) | 0.0001           | 0.04200                     |
|                 | rs78758318 G>A  | 0.985 (G)                                | 0.015 (A) | 0.0050           | 0.07000                     |
|                 | rs11881781 G>C  | 0.895 (G)                                | 0.105 (C) | 0.1280           | 0.39600                     |
| <b>miR-155</b>  | rs190708267 C>T | 0.990 (C)                                | 0.010 (T) | 0.0010           | 0.01200                     |
| <b>miR-195</b>  | rs41283391 G>A  | 0.955 (G)                                | 0.045 (A) | 0.0410           | 0.71730                     |
| <b>miR-221</b>  | rs191213444 G>T | 0.995 (G)                                | 0.005 (T) | 0.0010           | 0.17300                     |
| <b>miR-335</b>  | rs201306521     | 0.990 (-)                                | 0.010 (T) | ND               |                             |
|                 | rs3807348 G>A   | 0.495 (G)                                | 0.485 (A) | 0.5390           | 0.22400                     |
|                 | rs376491654 T>C | 0.995 (T)                                | 0.005 (C) | 0.0003           | 0.04100                     |
|                 | rs41272366 T>A  | 0.980 (T)                                | 0.020 (A) | 0.0110           | 0.29100                     |
| <b>miR-497</b>  | rs755634302     | 0.995 (-)                                | 0.005 (T) | 0.0000           | 0.01400                     |

(-) without insertion; MAF: Minor allele frequency (reference allele)

<sup>a</sup>MAF reported in the dbSNPs database

<sup>b</sup>Fisher's exact test

Supplementary Table S3. List of primers

| Gene            | pre-miRNA (pb) | Primer sequence 5'-3'     | Ta (°C) | Amplicon (bp) |
|-----------------|----------------|---------------------------|---------|---------------|
| miR-10b         | 110            | F: TGGCAGAAGAATGAGGGAAC   | 60      | 532           |
|                 |                | R: ATCCATGCAACCAATTAGGC   |         |               |
| miR-21          | 72             | F: CCAGTTTTCTTGCCGTTCTG   | 60      | 596           |
|                 |                | R: TTTCAAAACCCACAATGCAG   |         |               |
| miR-125a        | 86             | F: TGCTGTGTCTCTGTGGCTTC   | 60      | 600           |
|                 |                | R: GAGGCGCTCAGAGTAGGTTG   |         |               |
| miR-145         | 88             | F: AATACACATGAGCCGTGCAG   | 60      | 530           |
|                 |                | R: GTGCTGAAGTCCCCACATCC   |         |               |
| miR-155         | 65             | F: TGAGCTCCTTCCTTTCAACAG  | 58      | 421           |
|                 |                | R: GGTTGAACATCCCAGTGACC   |         |               |
| miR-195/miR-497 | 87             | F: TGTTTGCCTTTTAAGGCTTCTC | 60      | 597           |
|                 |                | R: TCTCAGCTTCGTGCTGTCTG   |         |               |
| miR-221         | 110            | F: TCCATCCAGCTTTTCATCTC   | 60      | 516           |
|                 |                | R: AGACCATTGGGTGAAATCG    |         |               |
| miR-222         | 112            | F: TTGTGTGCTGCTGGATCTC    | 60      | 374           |
|                 |                | R: TGCCCAATAATCTCTCTCAGG  |         |               |
| miR-335         | 94             | F: CCACCATTGGTTCTCTCTCC   | 58      | 550           |
|                 |                | R: TTTTGTCTTGAGAATCTGTGC  |         |               |
| miR-520c        | 87             | F: TGCAGATGGTCCTTTTAGGG   | 60      | 372           |
|                 |                | R: CAGCAAGAACGAACTCCATC   |         |               |

Ta: annealing temperature
